# Supplementary material for: Two-dimensional ion–molecule chelation reaction (2D-IMCRs) to form a two-dimensional dual optical sensor (2D-DOS): synthesis and application of Phen-SnO2 nanosheets for the fluorometric and colorimetric sensing of nitroaromatic explosives
Source: Royal Society of Chemistry journal article supplement (doi:10.1039/d3en00475a), 2023-01-01
Supplement: d3en00475a1.pdf [file d3en00475a1.pdf]

## Supplementary File

**Two Dimensional Ion-Molecule Chelation Reaction (2D-IMCR) to form the two dimensional dual optical sensor (2D-DOS): synthesis and application of the Phen-SnO<sub>2</sub> nanosheets for fluorometric and colorimetric sensing for Nitro-aromatic explosives**

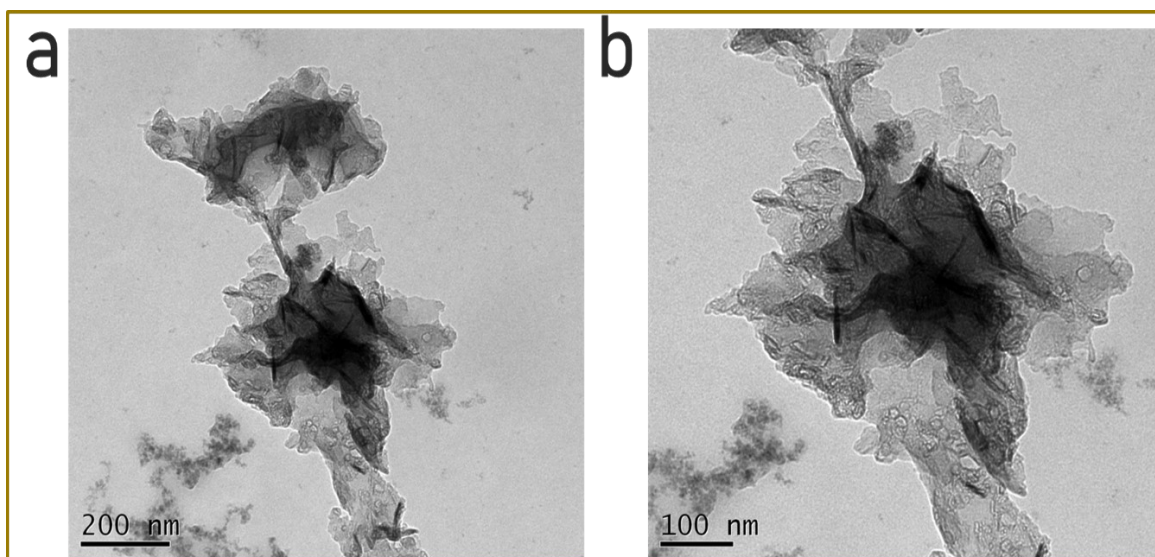

**Figure. S1** TEM images for synthesized Phen-SnO<sub>2</sub> nanosheets.

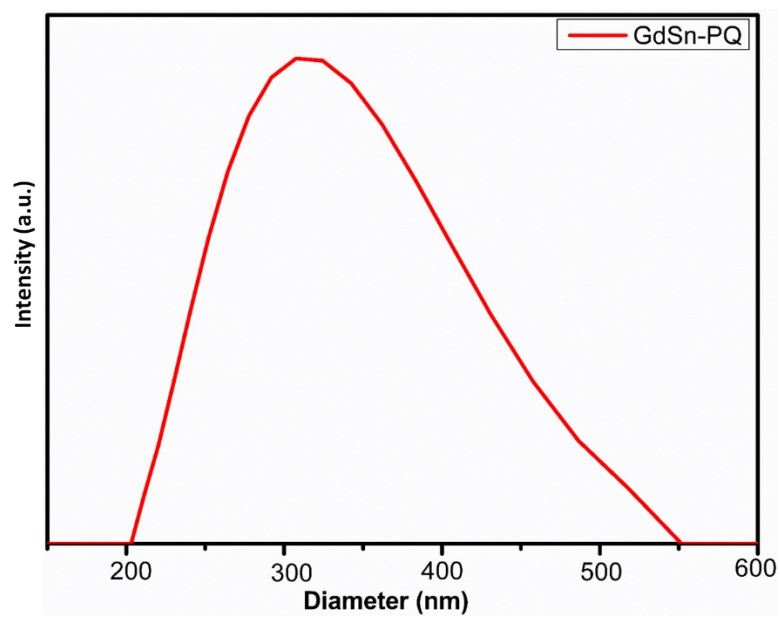

**Figure. S2** DLS results for the synthesized Phen-SnO<sub>2</sub> nanosheets.

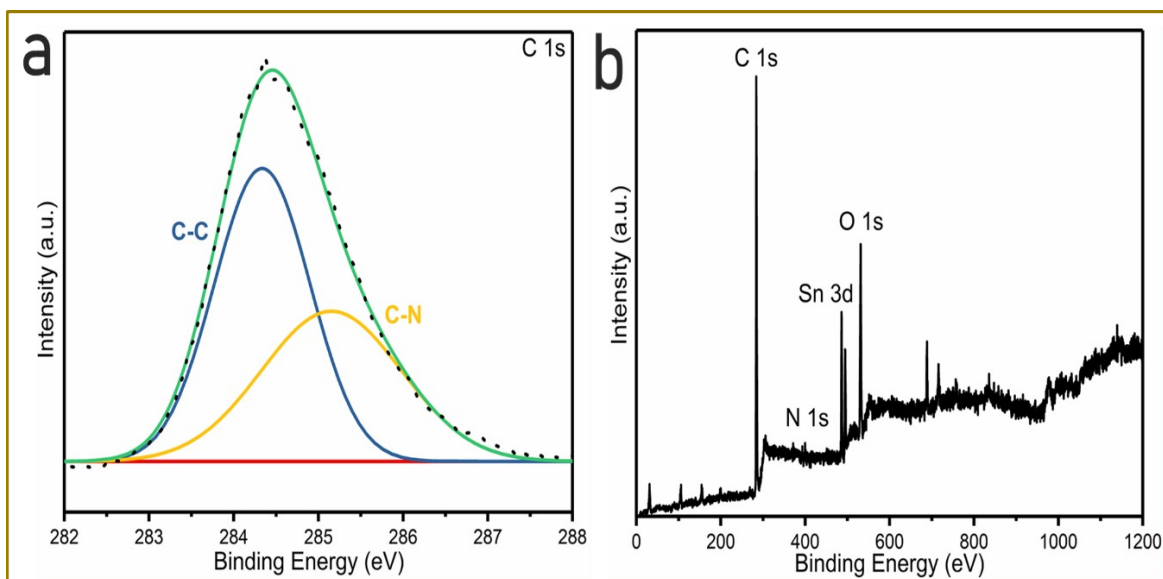

**Figure. S3** XPS analysis for the synthesized Phen-SnO<sub>2</sub> nanosheets (a) C 1s spectra (b) XPS survey scan.

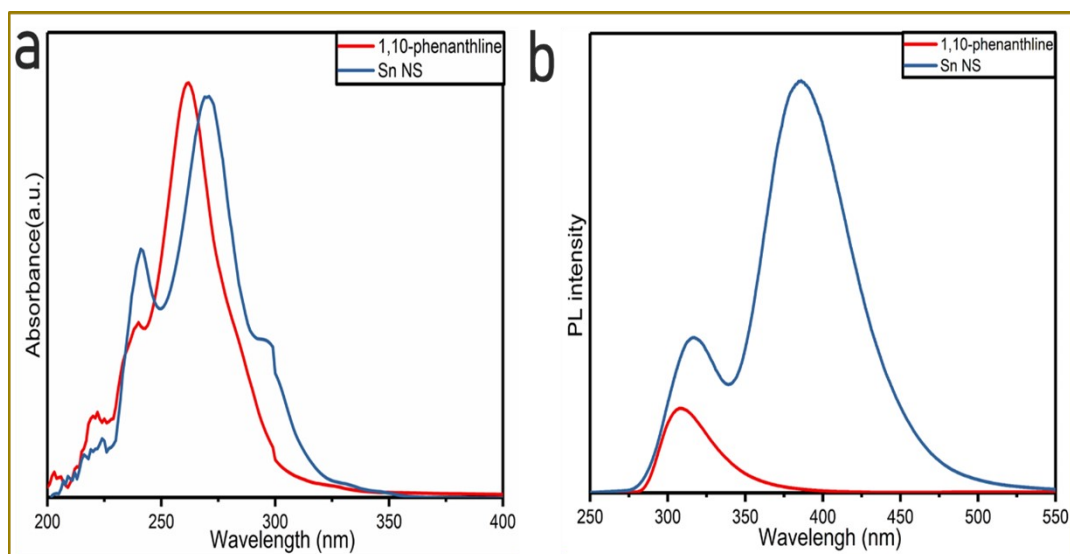

**Figure. S4** UV and PL spectra for comparison of the Phen-SnO<sub>2</sub> nanosheets with the precursor molecule, 1,10- phenanthroline (Control).

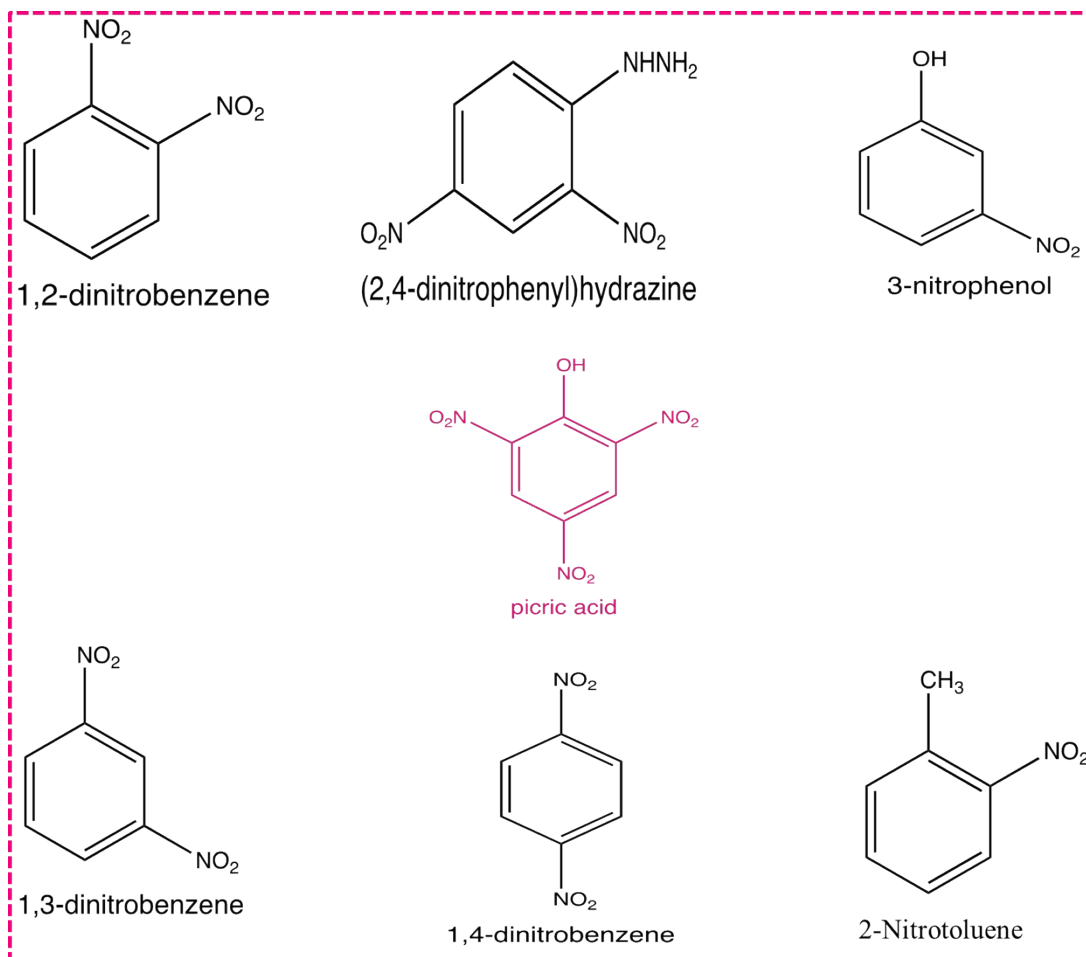

**Figure. S5** Chemical structures of all NACs used for the application/detection studies.

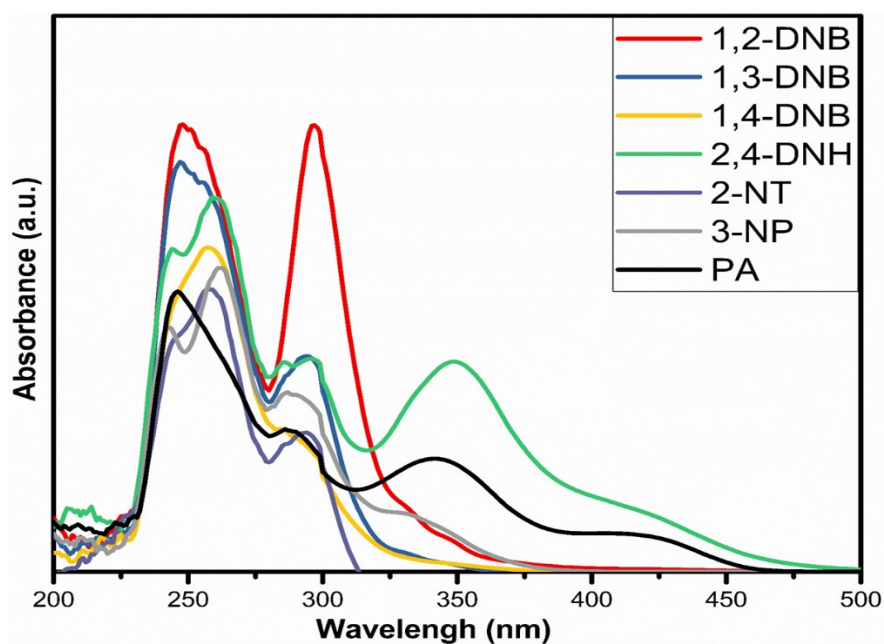

**Figure. S6** UV absorbance data of all NACs prior to the addition of the Phen-SnO<sub>2</sub> nanosheets.

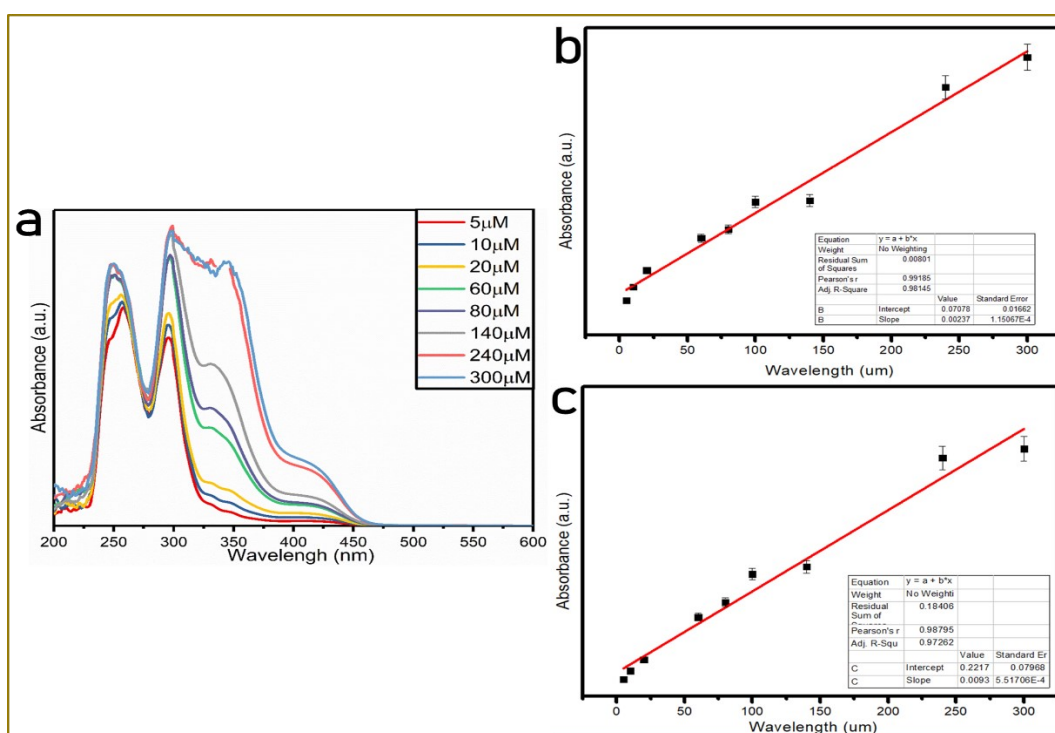

**Figure. S7** Colorimetric detection of PA using the Phen-SnO<sub>2</sub> nanosheets

## Calculation Section

### LOD calculations for PA detection

|                  | <i>Value</i>   | <i>Standard Error</i> |
|------------------|----------------|-----------------------|
| <i>Intercept</i> | <i>0.68135</i> | <i>0.87991</i>        |
| <i>Slope</i>     | <i>0.17804</i> | <i>0.00609</i>        |

**LOD (PA):**  $K \times SD/S$

$K=3$

$SD = \text{Intercept}/1000 = 0.68/1000 = 0.00068$

$\text{LOD (PA)} = 3 \times 0.00068/0.178 = 0.011 \mu\text{M}$

Where,

$K = \text{Constant}$

$SD = \text{Standard Deviation of regression line}$

$S = \text{Slope}$

**Table S1.** Comparison table of different fluorescent probes with Phen-SnO<sub>2</sub> nanosheets for the detection of picric acid

| Fluorescent Probe                              | Synthesis Route                                 | Linear Range         | Limit of Detection             | Quenching Efficiency(%) | Ref              |
|------------------------------------------------|-------------------------------------------------|----------------------|--------------------------------|-------------------------|------------------|
| Carbon nanoparticles                           | Microwave<br>Pyrolysis                          | 0-20 $\mu\text{M}$   | 0.25 $\mu\text{M}$             | 75                      | 1                |
| N@CDs                                          | Hydrothermal                                    | 1-75 $\mu\text{M}$   | 2.45 $\mu\text{M}$             | -                       | 2                |
| Ni-OBA-Bpy-18 MOF/GCE                          | Sonication                                      | 0-300 $\mu\text{L}$  | 66.43 ppb                      | 35                      | 3                |
| NCDs Malic acid and Urea                       | Microwave<br>pyrolysis                          | 0-1.6 $\mu\text{M}$  | 33nM                           | -                       | 4                |
| PFAM                                           | Suzuki coupling<br>polymerization               | 0-50 $\mu\text{M}$   | 57.8 nM                        | 95                      | 5                |
| Hydrazine-substituted BODIPY                   | Stirring                                        | 0-40 $\mu\text{M}$   | 0.44 $\mu\text{M}$             | 65.14                   | 6                |
| palladium-based macro-cycles                   | Stirring                                        | 0–100 $\mu\text{M}$  | 0.2 $\mu\text{M}$              | 60                      | 7                |
| ,5-bis((E)-4-bromostyryl)-3,4-diphenylthiophen | Suzuki coupling<br>and Wittig–Horner<br>reactio | 40-440 $\mu\text{M}$ | 0.47 $\mu\text{M}$             | -                       | 8                |
| supramolecular receptor                        | Click Chemsirty                                 | 0-47.6 $\mu\text{M}$ | 2.52 $\mu\text{M}$             | -                       | 9                |
| Phen-SnO <sub>2</sub> Nanosheets               | Probe<br>Ultrasonication                        | 0-300 $\mu\text{M}$  | 0.011 $\mu\text{M}$<br>(11 nm) | 99.92                   | This<br>Wor<br>k |

## References

- 1 X.Sun, J.He, Y.Meng, L.Zhang, S.Zhang, X.Ma, S.Dey, J.Zhao and Y.Lei, Microwave-assisted ultrafast and facile synthesis of fluorescent carbon nanoparticles from a single precursor: preparation, characterization and their application for the highly selective detection of explosive picric acid. *J. Mater. Chem. A*, 2016, **4**, 4161–4171.
- 2 A.Saravanan, M.Maruthapandi, P.Das, S.Ganguly, S.Margel, J. H. T.Luong and A.Gedanken, Applications of N-doped carbon dots as antimicrobial agents, antibiotic carriers, and selective fluorescent probes for nitro explosives. *ACS Appl. Bio Mater.*, 2020, **3**, 8023–8031.
- 3 S.Chongdar, U.Mondal, T.Chakraborty, P.Banerjee and A.Bhaumik, A Ni-MOF as Fluorescent/Electrochemical Dual Probe for Ultrasensitive Detection of Picric Acid from Aqueous Media. *ACS Appl. Mater. Interfaces*, 2023, **15**, 14575–14586.
- 4 M. K.Mahto, D.Samanta, M.Shaw, M. A. S.Shaik, R.Basu, I.Mondal, A.Bhattacharya and A.Pathak, Blue-Emissive Nitrogen-Doped Carbon Dots for Picric Acid Detection: Molecular Fluorescence Quenching Mechanism. *ACS Appl. Nano Mater.*, 2023, **6**, 8059–8070.
- 5 A. S.Tanwar, S.Hussain, A. H.Malik, M. A.Afroz and P. K.Iyer, Inner filter effect based selective detection of nitroexplosive-picric acid in aqueous solution and solid support using conjugated polymer. *Acs Sensors*, 2016, **1**, 1070–1077.
- 6 J.Gao, X.Chen, S.Chen, H.Meng, Y.Wang, C.Li and L.Feng, The BODIPY-based chemosensor for fluorometric/colorimetric dual channel detection of RDX and PA. *Anal. Chem.*, 2019, **91**, 13675–13680.
- 7 S.Kumar, R.Kishan, P.Kumar, S.Pachisia and R.Gupta, Size-Selective Detection of Picric Acid by Fluorescent Palladium Macrocycles. *Inorg. Chem.*, 2018, **57**,



1693–1697.

- 8 L. R.Adil, P.Gopikrishna and P.Krishnan Iyer, Receptor-Free Detection of Picric Acid: A New Structural Approach for Designing Aggregation-Induced Emission Probes. *ACS Appl. Mater. Interfaces*, 2018, **10**, 27260–27268.
- 9 V.Bharadwaj, J. E.Park, S. K.Sahoo and H.Choi, Selective Fluorescent Turn-Off Detection of Picric Acid Using a Novel Tripodal Supramolecular Triazole-Trindane Based Receptor. *ChemistrySelect*, 2019, **4**, 10895–10901.
